# Supplementary material
Source: PubMed Central journal article supplement (PMC2949044)
Supplement: pp.110.162552_1.pdf [file pp.110.162552_1.pdf]

Table S1. Primer sequences for target gene amplification by RT-PCR.

| Gene | Direction | Sequence (5' => 3')      | Base Pairs | Product Length |
|------|-----------|--------------------------|------------|----------------|
| ADS  | Forward   | ATACAACGGGCACTAAAGCAACC  | 23         | 297 bp         |
| ADS  | Reverse   | GAAAACCTCTAGCCCGGAATACTG | 24         | 297 bp         |
| CYP  | Forward   | GGGTTAGGGATTTAGCCAGAA    | 22         | 218 bp         |
| CYP  | Reverse   | AATTGCCTCCAGTACTCACCATAA | 24         | 218 bp         |
| DXR  | Forward   | ATTGCTGGCGGTCCCTTTGTTCTT | 24         | 237 bp         |
| DXR  | Reverse   | CTTTTCTCCCCATGCTCAGTTAGG | 24         | 237 bp         |
| DXS  | Forward   | ATGGGTTGGCGGGATTAC       | 19         | 274 bp         |
| DXS  | Reverse   | CCGTCAAGATTGGCAGTAGGTAAA | 24         | 274 bp         |
| FPS  | Forward   | GTATGATTGCTGCGAACGATGGA  | 23         | 211 bp         |
| FPS  | Reverse   | CGGCGGTGAATAGACAATGAATAC | 24         | 211 bp         |
| HMGR | Forward   | GGTCAGGATCCGGCCAAAACATT  | 24         | 251 bp         |
| HMGR | Reverse   | CCAGCCAACACCGAACCAGCAACT | 24         | 251 bp         |
| 18S  | Forward   | TCCGCCGGCACCTTATGAGAAATC | 24         | 219 bp         |
| 18S  | Reverse   | CTAAGAACGGCCATGCACCACCAC | 24         | 219 bp         |

Abbreviations: ADS, amorpho-4,11-diene synthase; CYP, P450 CYP71AV1; DXR, 1-deoxy-D-xylulose-5-phosphate reductoisomerase; DXS, deoxy-D-xylulose-5-phosphate synthase; FPS, farnesyl diphosphate synthase; HMGR, 3-hydroxy-3-methylglutaryl-CoA reductase; SQS, squalene synthase; 18S, 18S ribosomal small subunit.

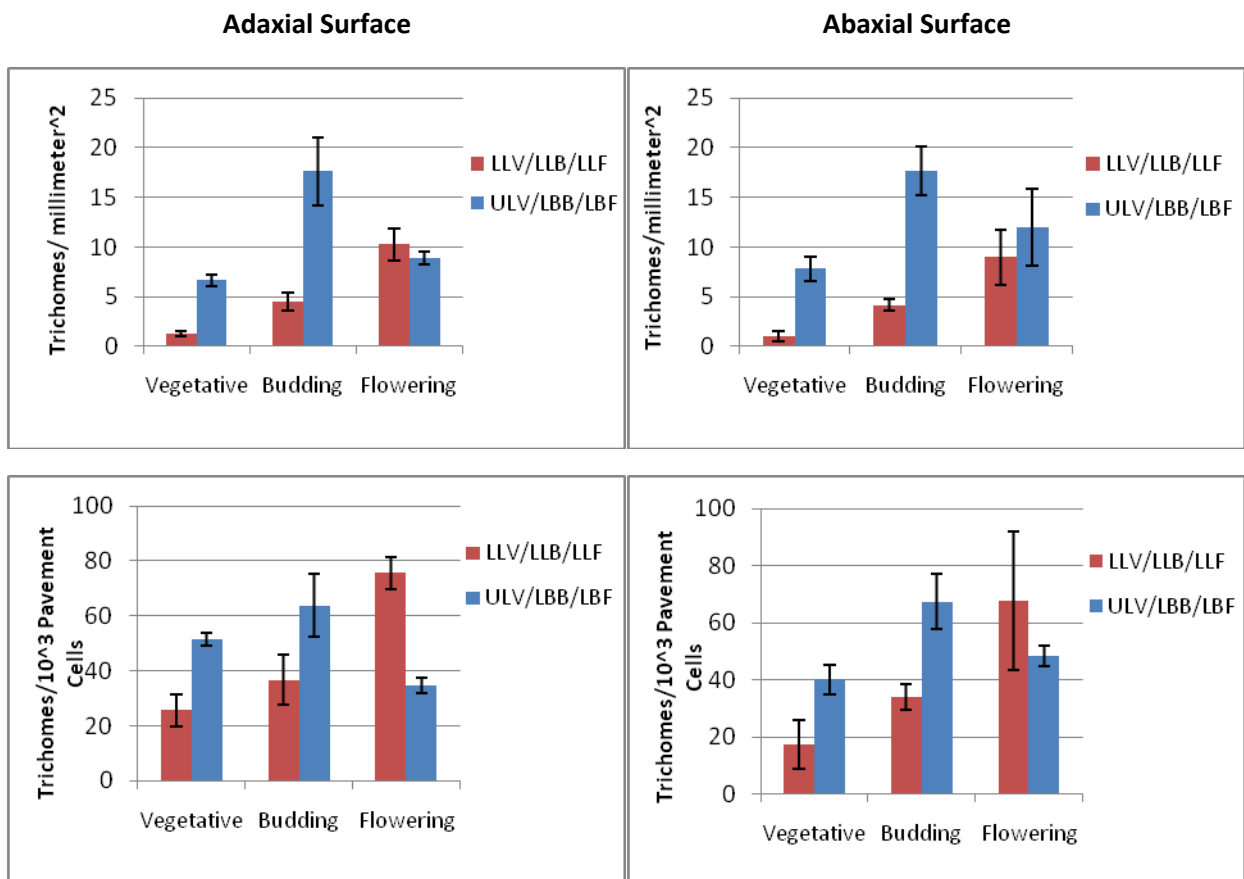

Figure S1: Trichome populations of leaves from vegetative, budding, and flowering plants relative to leaf position and surface. Error bars represent  $\pm 1$  SD ( $n=4$ ). See Figure 2 for definition of leaf positions. LLV: Lower Leaves of Vegetative Plants, LLB: Lower leaves of budding plants, LLF: Lower leaves of flowering plants, ULV: Upper leaves of vegetative plants, LBB: Leafy bracts of budding plants, LBF: Leafy bracts of flowering plants.
